# Supplementary material for: Somatic copy number alterations detected by ultra-deep targeted sequencing predict prognosis in oral cavity squamous cell carcinoma
Source: PubMed Central journal article supplement (PMC4637328; doi:10.18632/oncotarget.4336), 2015-06-02
Supplement: oncotarget-06-19891-s001.pdf [file oncotarget-06-19891-s001.pdf]

# **Somatic copy number alterations detected by ultra-deep targeted sequencing predict prognosis in oral cavity squamous cell carcinoma**

## **Supplementary Material**

### **The filtering process for SNVs reported by the Torrent Variant Caller.**

All of the SNVs reported by the Torrent Variant Caller should satisfy each of the following conditions:

1. Allelic frequency  $\geq 0.03$ .
2. Absence in the database of common variants, as defined by the dbSNP.
3. Absence in the SNP database of the International HapMap Project (general population database).
4. Absence in the SNP database of the 1000 Genomes Project (general population database).
5. Nonsynonymous SNV or SNV occurred in splicing sites.

Kaplan-Meier curves with 95% confidence intervals

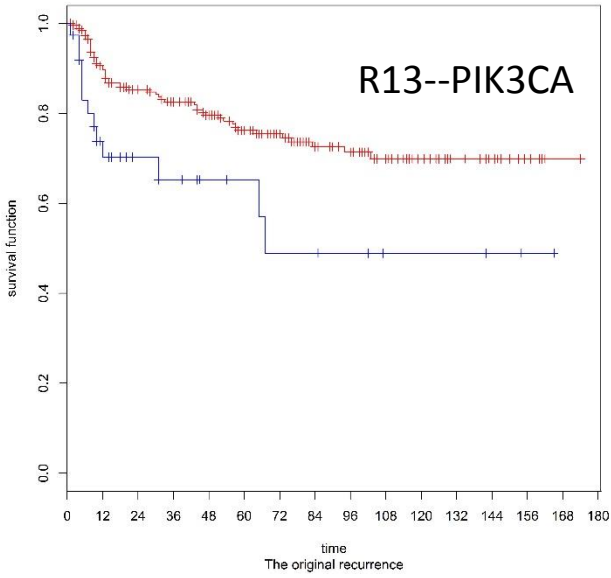

Kaplan-Meier curves with 95% confidence intervals

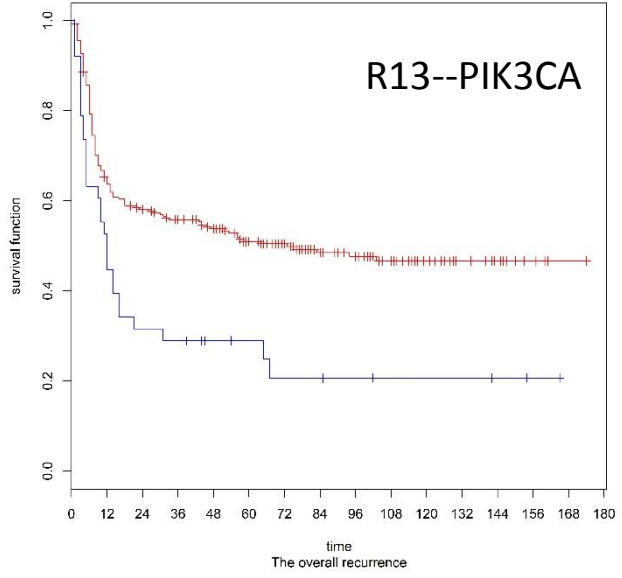

Kaplan-Meier curves with 95% confidence intervals

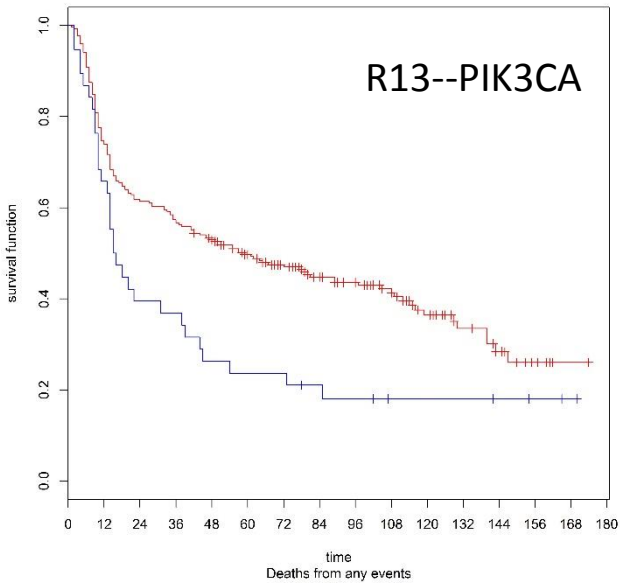

Kaplan-Meier curves with 95% confidence intervals

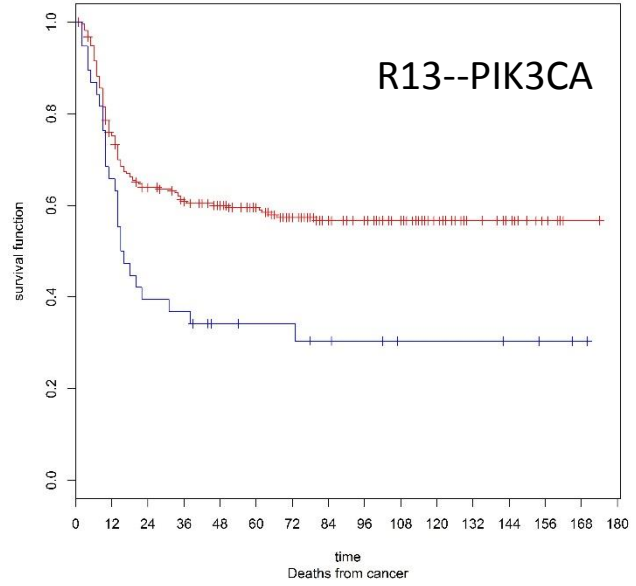

Kaplan-Meier curves with 95% confidence intervals

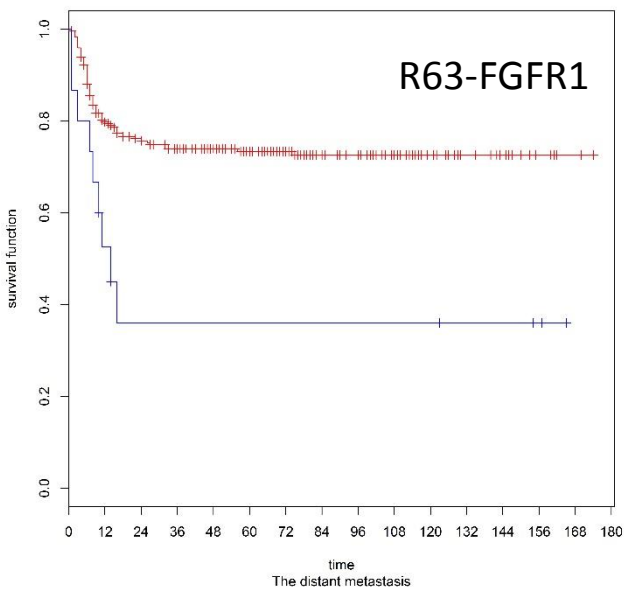

Kaplan-Meier curves with 95% confidence intervals

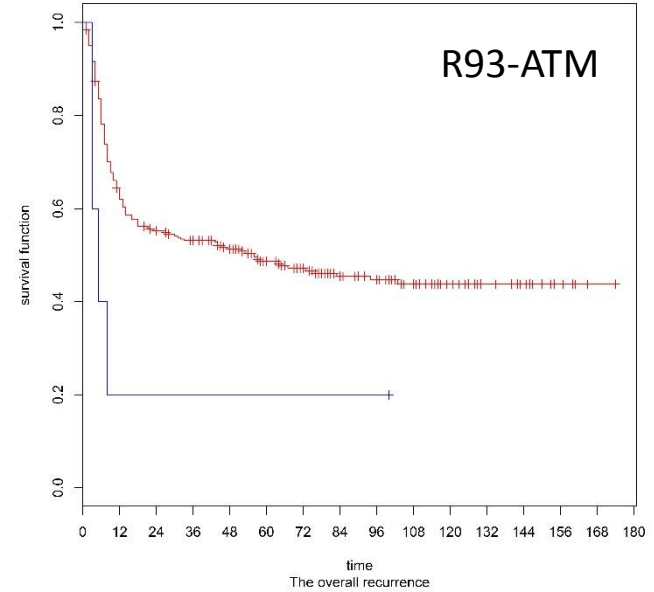

Kaplan-Meier curves with 95% confidence intervals

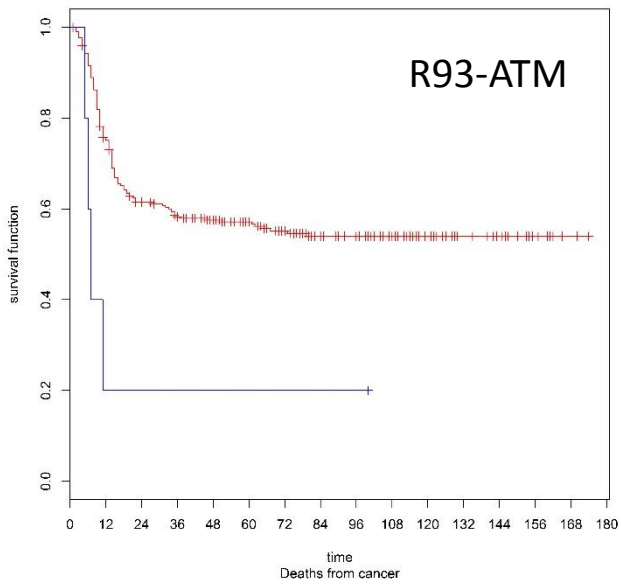

Kaplan-Meier curves with 95% confidence intervals

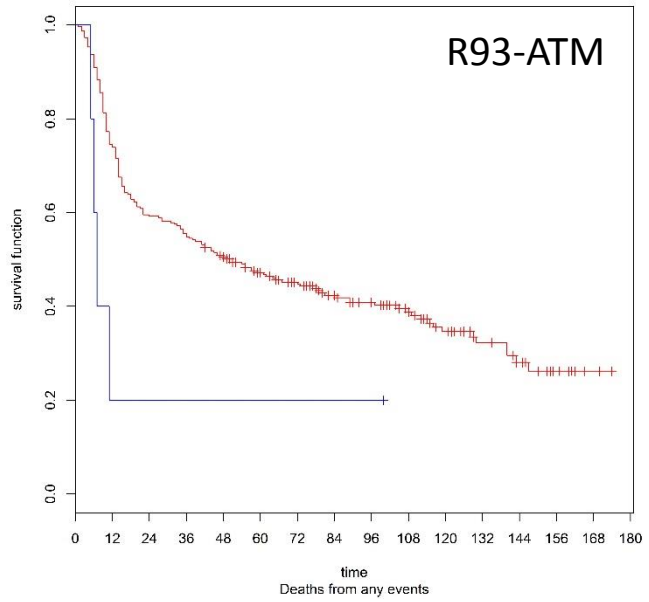

Kaplan-Meier curves with 95% confidence intervals

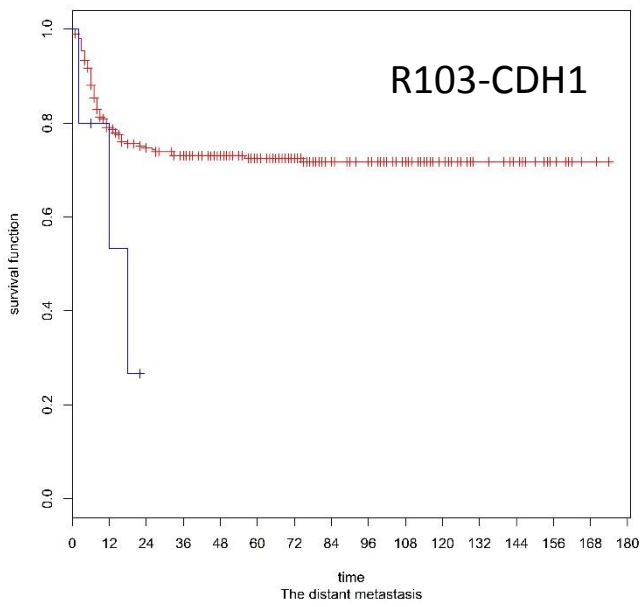

Kaplan-Meier curves with 95% confidence intervals

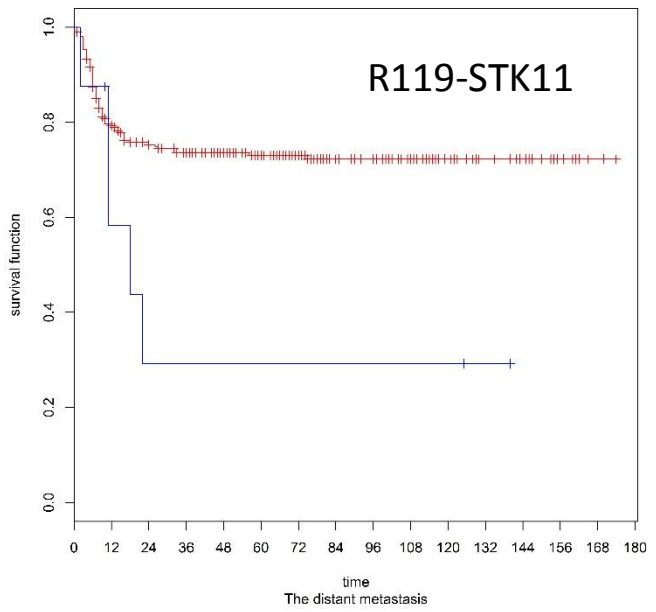

Kaplan-Meier curves with 95% confidence intervals

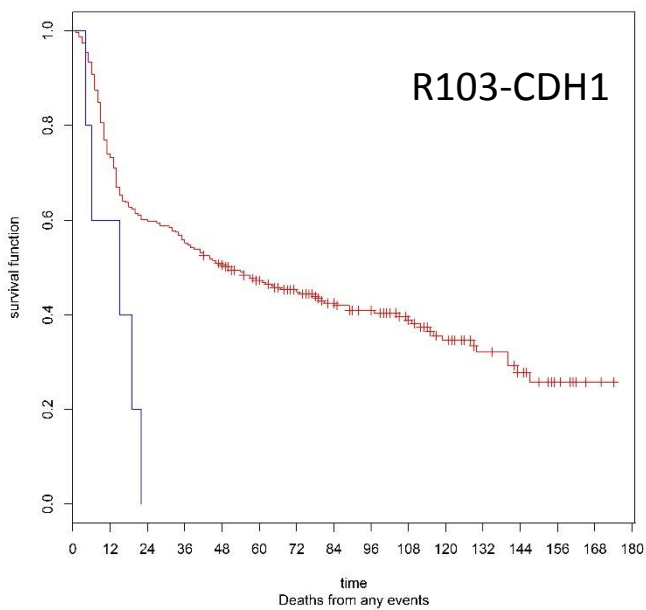

Kaplan-Meier curves with 95% confidence intervals

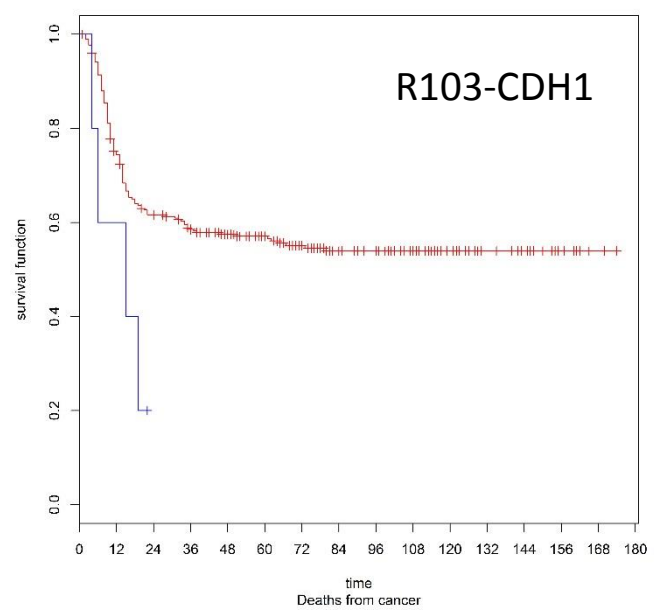

**Figure S1.** Kaplan-Meier plots showing the associations between consistently replicated copy number amplifications and clinical outcomes.

Kaplan-Meier curves with 95% confidence intervals

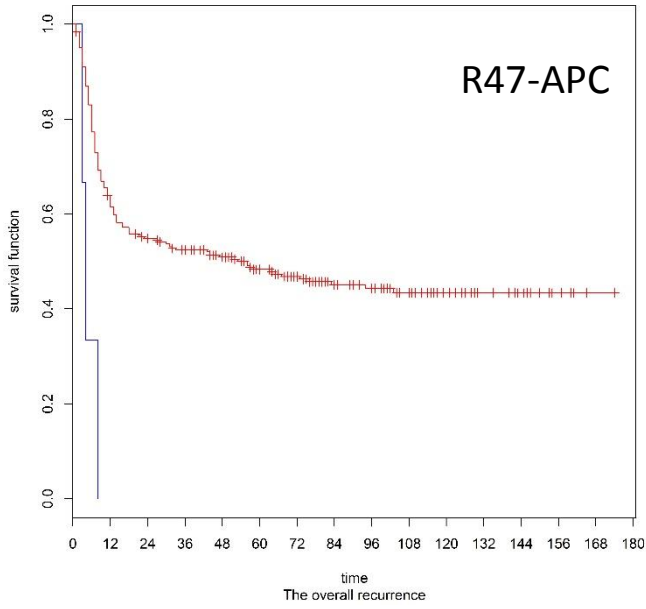

Kaplan-Meier curves with 95% confidence intervals

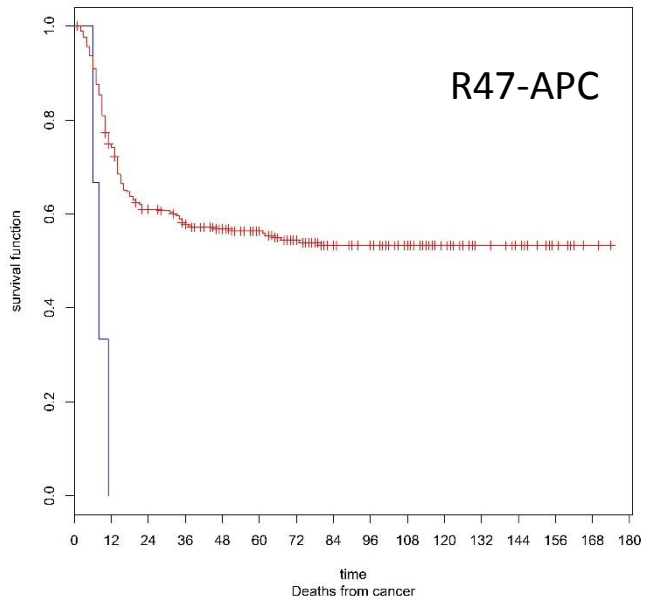

Kaplan-Meier curves with 95% confidence intervals

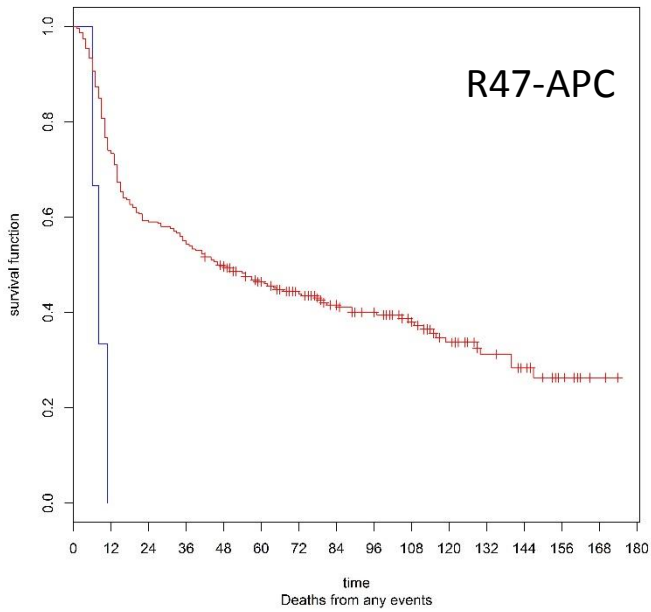

Kaplan-Meier curves with 95% confidence intervals

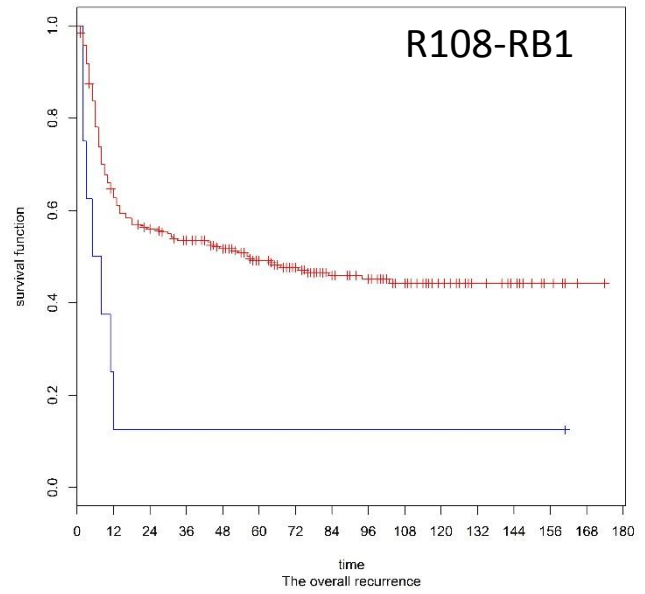

Kaplan-Meier curves with 95% confidence intervals

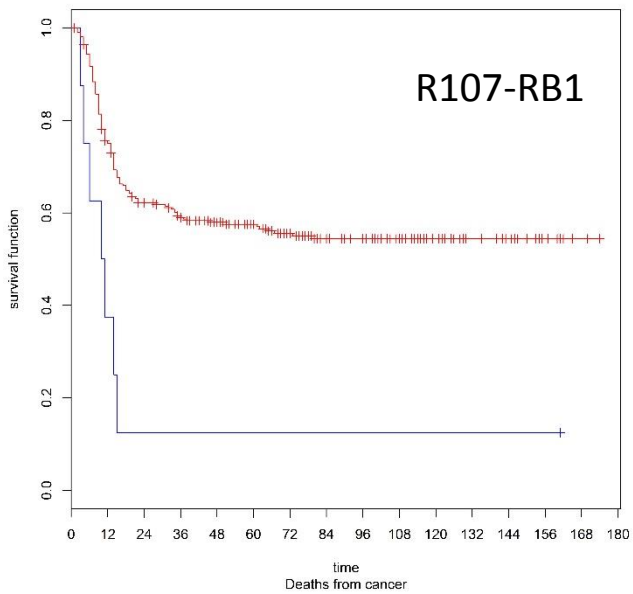

Kaplan-Meier curves with 95% confidence intervals

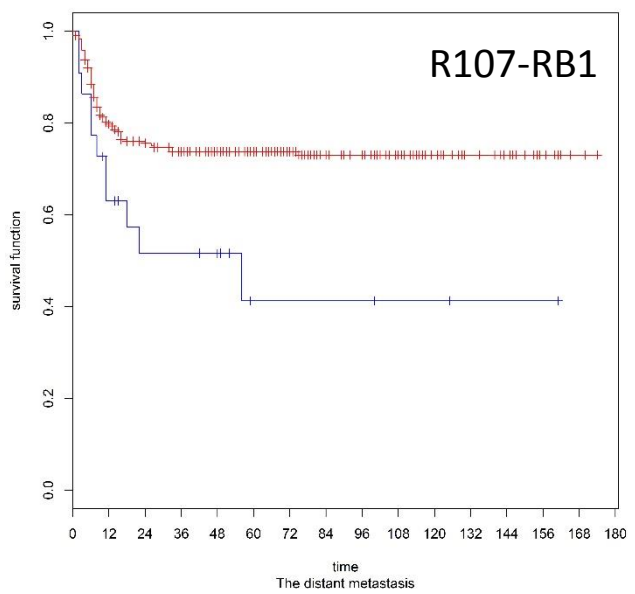

Kaplan-Meier curves with 95% confidence intervals

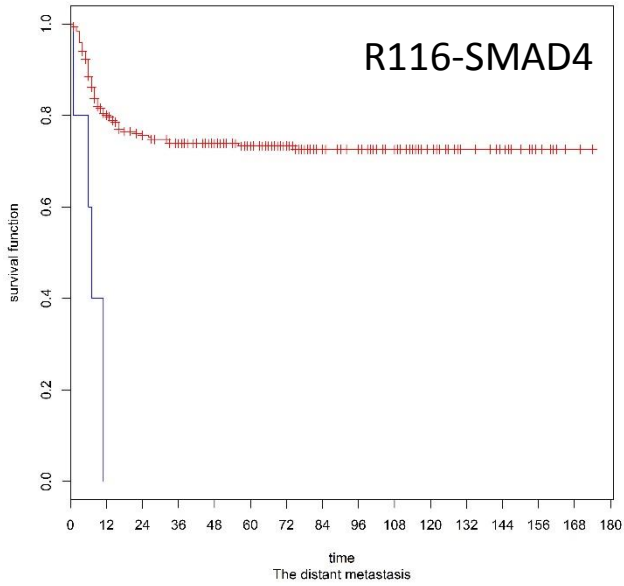

Kaplan-Meier curves with 95% confidence intervals

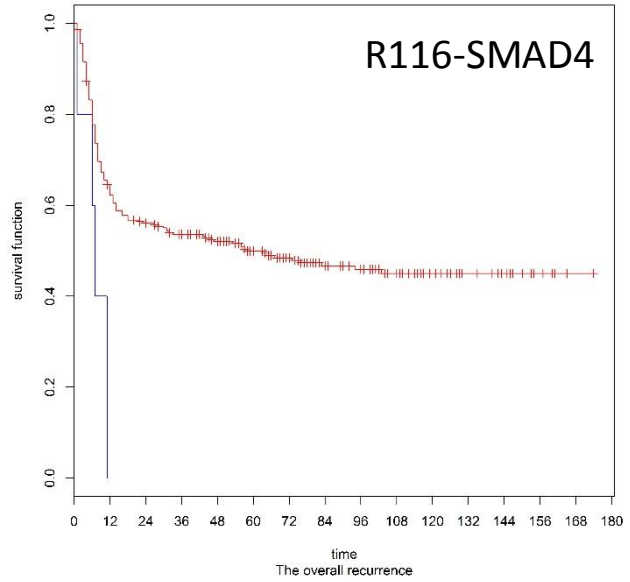

Kaplan-Meier curves with 95% confidence intervals

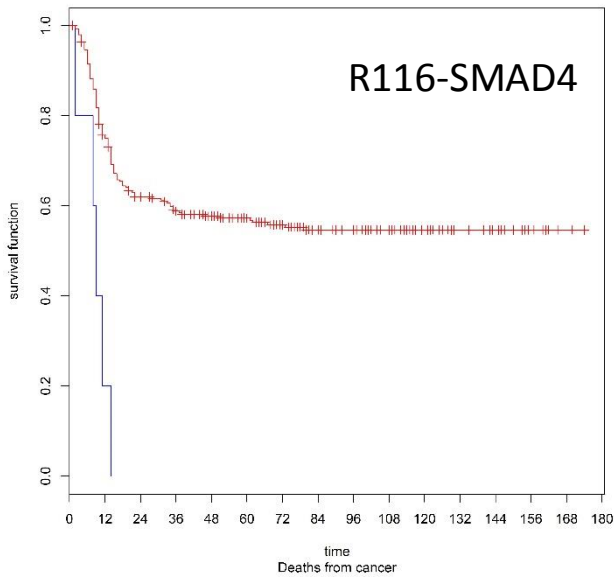

Kaplan-Meier curves with 95% confidence intervals

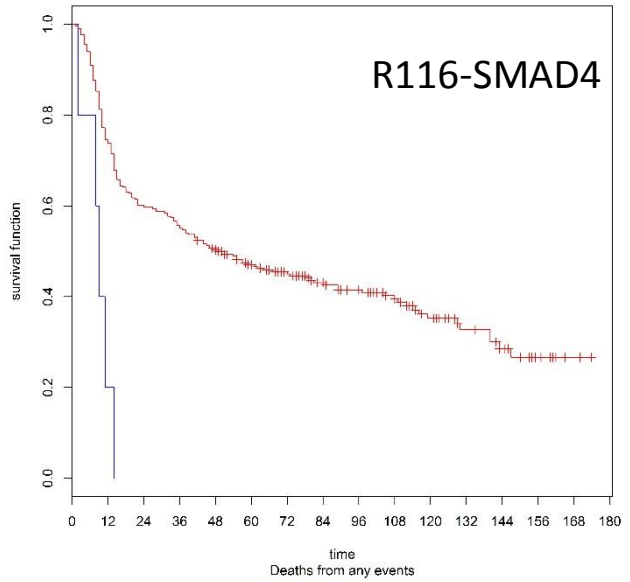

Kaplan-Meier curves with 95% confidence intervals

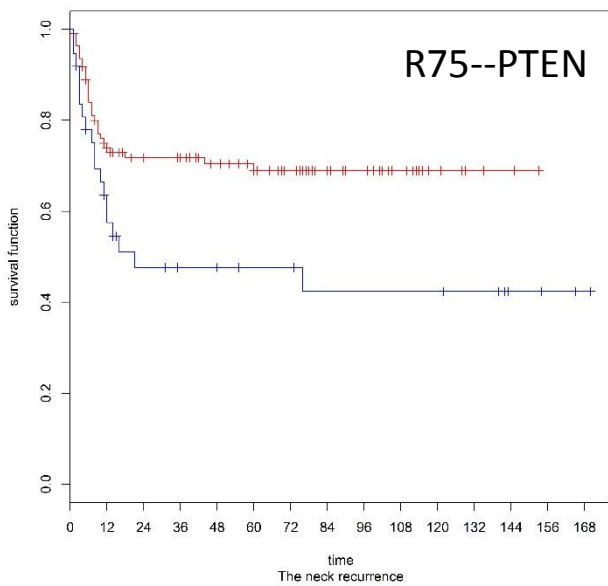

Kaplan-Meier curves with 95% confidence intervals

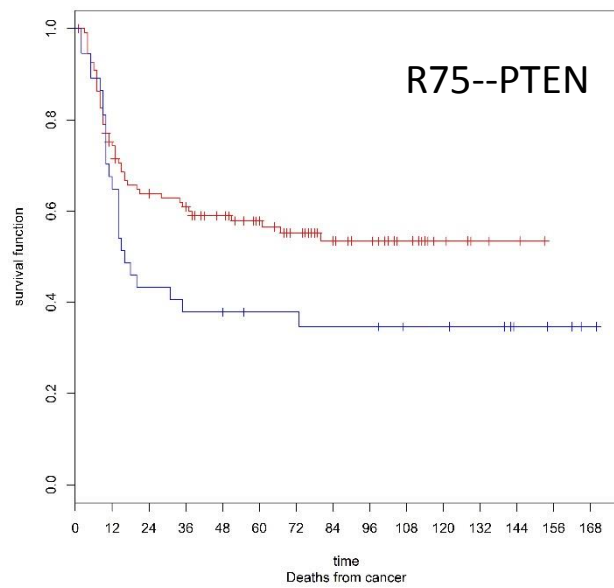

Kaplan-Meier curves with 95% confidence intervals

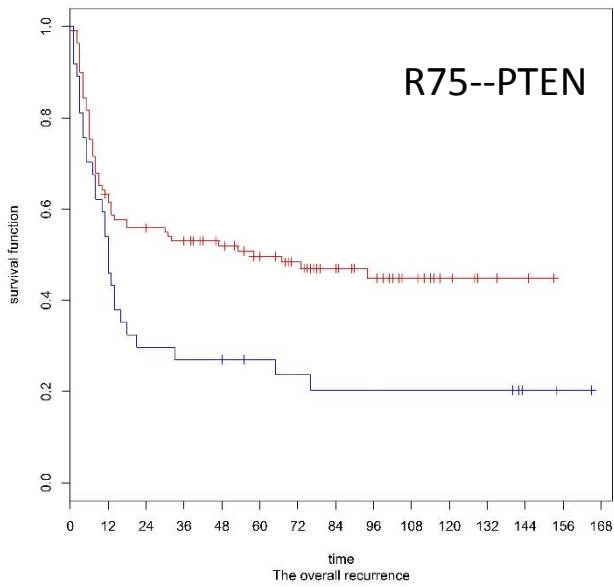

**Figure S2.** Kaplan-Meier plots showing the associations between consistently replicated copy number deletions and clinical outcomes.

**Table S1.** List of the 46 genes analyzed by ultra-deep targeted sequencing

|        |       |      |        |         |
|--------|-------|------|--------|---------|
| ABL1   | EGFR  | HRAS | NOTCH1 | SMARCB1 |
| AKT1   | ERBB2 | IDH1 | NPM1   | SMO     |
| ALK    | ERBB4 | JAK2 | NRAS   | SRC     |
| APC    | FBXW7 | JAK3 | PDGFRA | STK11   |
| ATM    | FGFR1 | KDR  | PIK3CA | TP53    |
| BRAF   | FGFR2 | KIT  | PTEN   | VHL     |
| CDH1   | FGFR3 | KRAS | PTPN11 |         |
| CDKN2A | FLT3  | MET  | RB1    |         |
| CSF1R  | GNAS  | MLH1 | RET    |         |
| CTNNB1 | HNF1A | MPL  | SMAD4  |         |



**Table S2.** Log-rank tests of different clinical outcomes in relation to focal copy number amplifications

| Clinical outcome      | CNA-harboring gene | Hazard ratio | FDR adjusted P values |
|-----------------------|--------------------|--------------|-----------------------|
| Second primary tumors | ERBB4              | 5.711        | 0.05359               |
| Second primary tumors | KDR                | 4.399        | 0.128281              |
| Second primary tumors | RB1                | 3.524        | 0.11415               |
| Second primary tumors | TP53               | 11.909       | 0.000389              |
| Second primary tumors | ERBB2              | 9.707        | 0.006449              |
| Local recurrence      | PIK3CA             | 2.332        | 0.020028              |
| Local recurrence      | KIT                | 3.378        | 0.116609              |
| Local recurrence      | MET                | 2.147        | 0.018173              |
| Local recurrence      | JAK2               | 8.834        | 0.009555              |
| Local recurrence      | FGFR2              | 2.131        | 0.044413              |
| Local recurrence      | ATM                | 2.302        | 0.046334              |
| Local recurrence      | SMAD4              | 2.439        | 0.111215              |
| Local recurrence      | GNAS               | 2.424        | 0.04367               |
| Local recurrence      | SMARCB1            | 1.712        | 0.126397              |
| Neck recurrence       | ALK                | 1.720        | 0.045986              |
| Neck recurrence       | PIK3CA             | 1.793        | 0.118995              |

---

|                    |        |        |          |
|--------------------|--------|--------|----------|
| Neck recurrence    | FBXW7  | 0.370  | 0.059376 |
| Neck recurrence    | APC    | 2.200  | 0.133036 |
| Neck recurrence    | JAK2   | 6.304  | 0.00691  |
| Neck recurrence    | ATM    | 24.163 | 0.006927 |
| Neck recurrence    | MPL    | 0.436  | 0.076583 |
| Neck recurrence    | RB1    | 8.131  | 0.01132  |
| Neck recurrence    | RET    | 23.474 | 0.007416 |
| Distant metastases | MLH1   | 2.005  | 0.015232 |
| Distant metastases | PDGFRA | 3.285  | 0.015232 |
| Distant metastases | KDR    | 2.696  | 0.086268 |
| Distant metastases | APC    | 2.986  | 0.006234 |
| Distant metastases | FGFR1  | 3.043  | 0.005267 |
| Distant metastases | FGFR2  | 0.196  | 0.043997 |
| Distant metastases | HRAS   | 1.881  | 0.095354 |
| Distant metastases | FLT3   | 0.253  | 0.136246 |
| Distant metastases | CDH1   | 3.182  | 0.125833 |
| Distant metastases | ERBB2  | 3.535  | 0.086268 |
| Distant metastases | STK11  | 66.444 | 0.000397 |
| Distant metastases | GNAS   | 1.904  | 0.137368 |
| Distant metastases | SMO    | 8.034  | 0.011414 |
| Distant metastases | TP53   | 7.232  | 0.000422 |

---

---

|                           |        |        |          |
|---------------------------|--------|--------|----------|
| Distant metastases        | FGFR3  | 5.273  | 0.001057 |
| Distant metastases        | ERBB2  | 2.816  | 0.112271 |
| Distant metastases        | HNF1A  | 2.694  | 0.021986 |
| Distant metastases        | RB1    | 9.043  | 0.00683  |
| Distant metastases        | RET    | 13.325 | 0.031506 |
| Disease-free survival     | PIK3CA | 1.987  | 0.002668 |
| Disease-free survival     | FBXW7  | 0.597  | 0.108512 |
| Disease-free survival     | APC    | 2.644  | 0.001777 |
| Disease-free survival     | MET    | 1.775  | 0.005425 |
| Disease-free survival     | JAK2   | 5.516  | 0.00285  |
| Disease-free survival     | ATM    | 14.102 | 0.027695 |
| Disease-free survival     | HRAS   | 1.814  | 0.024415 |
| Disease-free survival     | ERBB2  | 2.980  | 0.088398 |
| Disease-free survival     | SMO    | 4.069  | 0.128539 |
| Disease-free survival     | PDGFRA | 31.941 | 0.00285  |
| Disease-free survival     | FGFR3  | 3.077  | 0.021433 |
| Disease-free survival     | STK11  | 31.098 | 0.003045 |
| Disease-free survival     | RB1    | 4.674  | 0.087732 |
| Disease-free survival     | RET    | 14.376 | 0.026579 |
| Disease-specific survival | PIK3CA | 1.945  | 0.006481 |
| Disease-specific survival | MLH1   | 1.538  | 0.086341 |

---

---

|                           |        |        |          |
|---------------------------|--------|--------|----------|
| Disease-specific survival | FBXW7  | 0.530  | 0.061604 |
| Disease-specific survival | APC    | 2.655  | 0.002528 |
| Disease-specific survival | MET    | 2.885  | 0.003454 |
| Disease-specific survival | FGFR1  | 2.184  | 0.035701 |
| Disease-specific survival | ABL1   | 1.546  | 0.067327 |
| Disease-specific survival | JAK2   | 7.222  | 0.000383 |
| Disease-specific survival | ATM    | 12.804 | 0.034817 |
| Disease-specific survival | HRAS   | 1.738  | 0.057376 |
| Disease-specific survival | CDH1   | 2.781  | 0.101434 |
| Disease-specific survival | SMAD4  | 0.258  | 0.126938 |
| Disease-specific survival | SMO    | 4.711  | 0.07245  |
| Disease-specific survival | PDGFRA | 31.674 | 0.00289  |
| Disease-specific survival | TP53   | 4.274  | 0.09712  |
| Disease-specific survival | FGFR3  | 3.009  | 0.042483 |
| Disease-specific survival | STK11  | 31.244 | 0.002974 |
| Disease-specific survival | ERBB2  | 2.658  | 0.050597 |
| Disease-specific survival | RB1    | 5.431  | 0.047742 |
| Disease-specific survival | RET    | 9.033  | 0.07245  |
| Overall survival          | PIK3CA | 1.697  | 0.020329 |
| Overall survival          | FBXW7  | 1.724  | 0.050968 |
| Overall survival          | KDR    | 1.873  | 0.073175 |

---

---

|                  |        |        |          |
|------------------|--------|--------|----------|
| Overall survival | APC    | 2.091  | 0.022218 |
| Overall survival | MET    | 1.481  | 0.064844 |
| Overall survival | JAK2   | 6.659  | 0.000668 |
| Overall survival | ATM    | 11.899 | 0.0401   |
| Overall survival | CDH1   | 3.323  | 0.023086 |
| Overall survival | ERBB2  | 2.622  | 0.129804 |
| Overall survival | SMAD4  | 0.322  | 0.064816 |
| Overall survival | SMO    | 4.391  | 0.091564 |
| Overall survival | PDGFRA | 27.164 | 0.004311 |
| Overall survival | TP53   | 3.982  | 0.122979 |
| Overall survival | FGFR3  | 3.043  | 0.020864 |
| Overall survival | STK11  | 27.273 | 0.004311 |
| Overall survival | RB1    | 5.139  | 0.056585 |
| Overall survival | RET    | 8.475  | 0.085023 |

---

**Table S3.** Log-rank tests of different clinical outcomes in relation to focal copy number deletions

| Clinical outcome      | CNA-harboring gene | Hazard ratio | FDR adjusted P values |
|-----------------------|--------------------|--------------|-----------------------|
| Second primary tumors | ERBB4              | 9.363        | 0.115586              |
| Second primary tumors | SMAD4              | 7.590        | 0.193956              |
| Local recurrence      | KIT                | 0.571        | 0.177049              |
| Local recurrence      | EGFR               | 3.220        | 0.163241              |
| Local recurrence      | ATM                | 0.615        | 0.17247               |
| Local recurrence      | HNF1A              | 9.266        | 0.099714              |
| Local recurrence      | RB1                | 4.998        | 0.007106              |
| Local recurrence      | SMO                | 2.438        | 0.092747              |
| Local recurrence      | PTEN               | 0.546        | 0.118786              |
| Local recurrence      | ERBB2              | 9.561        | 0.093865              |
| Local recurrence      | RET                | 2.303        | 0.123509              |
| Neck recurrence       | ERBB4              | 2.013        | 0.114452              |
| Neck recurrence       | APC                | 9.742        | 0.000499              |
| Neck recurrence       | SMAD4              | 16.956       | 5.06E-05              |
| Neck recurrence       | KIT                | 0.580        | 0.107829              |
| Neck recurrence       | TP53               | 3.277        | 0.05301               |
| Neck recurrence       | RB1                | 2.451        | 0.040416              |

---

|                           |        |        |           |
|---------------------------|--------|--------|-----------|
| Neck recurrence           | BRAF   | 0.602  | 0.12575   |
| Neck recurrence           | PTEN   | 0.403  | 0.110695  |
| Neck recurrence           | PDGFRA | 3.863  | 0.054354  |
| Distant metastases        | PTEN   | 66.158 | 0.000425  |
| Distant metastases        | RB1    | 2.270  | 0.039665  |
| Distant metastases        | TP53   | 2.025  | 0.0600823 |
| Distant metastases        | SMO    | 4.606  | 0.110999  |
| Distant metastases        | SMAD4  | 11.594 | 0.000123  |
| Disease-free survival     | ERBB4  | 1.900  | 0.049063  |
| Disease-free survival     | PDGFRA | 3.646  | 0.036772  |
| Disease-free survival     | APC    | 5.702  | 0.011237  |
| Disease-free survival     | MET    | 4.128  | 0.144504  |
| Disease-free survival     | PTEN   | 31.155 | 0.003559  |
| Disease-free survival     | RB1    | 3.021  | 0.014776  |
| Disease-free survival     | SMAD4  | 5.556  | 6.89E-05  |
| Disease-specific survival | ERBB4  | 1.872  | 0.086112  |
| Disease-specific survival | KIT    | 0.651  | 0.092464  |
| Disease-specific survival | APC    | 6.071  | 0.008054  |
| Disease-specific survival | MET    | 5.472  | 0.050529  |
| Disease-specific survival | ABL1   | 1.942  | 0.13819   |
| Disease-specific survival | PTEN   | 31.532 | 0.003566  |

---

---

|                           |       |        |          |
|---------------------------|-------|--------|----------|
| Disease-specific survival | RB1   | 3.600  | 0.003651 |
| Disease-specific survival | SMAD4 | 5.426  | 0.00093  |
| Overall survival          | KIT   | 0.674  | 0.053378 |
| Overall survival          | APC   | 5.794  | 0.009984 |
| Overall survival          | MET   | 5.214  | 0.05303  |
| Overall survival          | PTEN  | 27.218 | 0.005174 |
| Overall survival          | RB1   | 2.558  | 0.049577 |
| Overall survival          | SMAD4 | 5.144  | 0.001345 |

---



**Table S4** Pathogenic significance of genes with validated CNA in different human malignancies

according to the published literature

| <b>Gene</b>          | <b>Associated malignancy</b>                                                              |                                                                                                                                     |
|----------------------|-------------------------------------------------------------------------------------------|-------------------------------------------------------------------------------------------------------------------------------------|
| <b><i>ABL1</i></b>   | Acute lymphoblastic leukemia                                                              | [1]                                                                                                                                 |
| <b><i>FGFR1</i></b>  | Oral squamous cell carcinoma                                                              | [2]                                                                                                                                 |
| <b><i>FLT3</i></b>   | Cutaneous myelomonocytic leukemia                                                         | [3]                                                                                                                                 |
| <b><i>KDR</i></b>    | Glioblastoma, primitive neuroectodermal tumors                                            | [4-6]                                                                                                                               |
| <b><i>KIT</i></b>    | Glioblastoma, primitive neuroectodermal tumors                                            | [4-6]                                                                                                                               |
| <b><i>PIK3CA</i></b> | Oral squamous cell carcinoma                                                              | [7]                                                                                                                                 |
| <b><i>RB1</i></b>    | Oral squamous cell carcinoma, breast cancer, chronic lymphocytic leukemia, retinoblastoma | [8-11]                                                                                                                              |
| <b><i>RET</i></b>    | Thyroid carcinoma                                                                         | [12,13]                                                                                                                             |
|                      |                                                                                           | cBIO, 2014                                                                                                                          |
| <b><i>SMO</i></b>    | Melanoma                                                                                  | ( <a href="http://www.cbioportal.org/ctd2-dashboard-portal/index.do">http://www.cbioportal.org/ctd2-dashboard-portal/index.do</a> ) |
| <b><i>APC</i></b>    | Colorectal cancer, gastric adenocarcinomas                                                | [14,15]                                                                                                                             |
| <b><i>EGFR</i></b>   | Small cell lung cancer, non-small cell lung cancer                                        | [16,17]                                                                                                                             |
| <b><i>MET</i></b>    | Small cell lung cancer, non-small cell lung cancer                                        | [18,19]                                                                                                                             |
| <b><i>PTEN</i></b>   | Oral squamous cell carcinoma,                                                             | [20,21]                                                                                                                             |

---

prostate adenocarcinomas

---

**SMAD4** Oral squamous cell carcinoma [22]

---

**TP53** Oral squamous cell carcinoma [9,23,24]

---

1. Bernasconi P, Calatroni S, Giardini I, Inzoli A, Castagnola C, et al. (2005) ABL1 amplification in T-cell acute lymphoblastic leukemia. *Cancer Genet Cytogenet* 162: 146-150.
2. Freier K, Schwaenen C, Sticht C, Flechtenmacher C, Muhling J, et al. (2007) Recurrent FGFR1 amplification and high FGFR1 protein expression in oral squamous cell carcinoma (OSCC). *Oral Oncol* 43: 60-66.
3. Dijkman R, van Doorn R, Szuhai K, Willemze R, Vermeer MH, et al. (2007) Gene-expression profiling and array-based CGH classify CD4+CD56+ hematodermic neoplasm and cutaneous myelomonocytic leukemia as distinct disease entities. *Blood* 109: 1720-1727.
4. Nobusawa S, Stawski R, Kim YH, Nakazato Y, Ohgaki H (2011) Amplification of the PDGFRA, KIT and KDR genes in glioblastoma: a population-based study. *Neuropathology* 31: 583-588.
5. Holtkamp N, Ziegenhagen N, Malzer E, Hartmann C, Giese A, et al. (2007) Characterization of the amplicon on chromosomal segment 4q12 in glioblastoma multiforme. *Neuro Oncol* 9: 291-297.
6. Joensuu H, Puputti M, Sihto H, Tynninen O, Nupponen NN (2005) Amplification of genes encoding KIT, PDGFRalpha and VEGFR2 receptor tyrosine kinases is frequent in glioblastoma multiforme. *J Pathol* 207: 224-231.
7. Murugan AK, Munirajan AK, Tsuchida N (2013) Genetic deregulation of the PIK3CA oncogene in oral cancer. *Cancer Lett* 338: 193-203.
8. Chao HH, He X, Parker JS, Zhao W, Perou CM (2012) Micro-scale genomic DNA copy number aberrations as another means of mutagenesis in breast cancer. *PLoS One* 7: e51719.
9. Choi S, Myers JN (2008) Molecular pathogenesis of oral squamous cell carcinoma: implications for therapy. *J Dent Res* 87: 14-32.
10. Ouillette P, Collins R, Shakhan S, Li J, Li C, et al. (2011) The prognostic significance of various 13q14 deletions in chronic lymphocytic leukemia. *Clin Cancer Res* 17: 6778-6790.
11. Castera L, Dehainault C, Michaux D, Lumbroso-Le Rouic L, Aerts I, et al. (2013) Fine mapping of whole RB1 gene deletions in retinoblastoma patients confirms PCDH8 as a candidate gene for psychomotor delay. *Eur J Hum Genet* 21: 460-464.
12. Nakashima M, Takamura N, Namba H, Saenko V, Meirmanov S, et al. (2007) RET oncogene amplification in thyroid cancer: correlations with radiation-associated and high-grade malignancy. *Hum Pathol* 38: 621-628.
13. Ciampi R, Romei C, Cosci B, Vivaldi A, Bottici V, et al. (2012) Chromosome 10 and RET gene copy number alterations in hereditary and sporadic Medullary Thyroid Carcinoma. *Mol Cell Endocrinol* 348: 176-182.
14. Fang Z, Xiong Y, Li J, Liu L, Zhang W, et al. (2012) APC gene deletions in gastric adenocarcinomas in a Chinese population: a correlation with tumour progression. *Clin Transl Oncol* 14: 60-65.
15. Bogaert J, Prenen H (2014) Molecular genetics of colorectal cancer. *Ann Gastroenterol* 27: 9-14.
16. Rosell R, Taron M, Reguart N, Isla D, Moran T (2006) Epidermal growth factor receptor activation: how exon 19 and 21 mutations changed our understanding of the pathway. *Clin Cancer Res* 12: 7222-7231.
17. Marchetti A, Del Gramastro M, Filice G, Felicioni L, Rossi G, et al. (2012) Complex mutations &

subpopulations of deletions at exon 19 of EGFR in NSCLC revealed by next generation sequencing: potential clinical implications. *PLoS One* 7: e42164.

18. Kong-Beltran M, Seshagiri S, Zha J, Zhu W, Bhawe K, et al. (2006) Somatic mutations lead to an oncogenic deletion of met in lung cancer. *Cancer Res* 66: 283-289.
19. Beau-Faller M, Ruppert AM, Voegeli AC, Neuville A, Meyer N, et al. (2008) MET gene copy number in non-small cell lung cancer: molecular analysis in a targeted tyrosine kinase inhibitor naive cohort. *J Thorac Oncol* 3: 331-339.
20. Wang SI, Parsons R, Ittmann M (1998) Homozygous deletion of the PTEN tumor suppressor gene in a subset of prostate adenocarcinomas. *Clin Cancer Res* 4: 811-815.
21. Mendes RA (2012) Oncogenic Pathways in the Development of Oral Cancer. *Journal of Carcinogenesis & Mutagenesis* 3:2.
22. Wang X, Sun W, Bai J, Ma L, Yu Y, et al. (2009) Growth inhibition induced by transforming growth factor-beta1 in human oral squamous cell carcinoma. *Mol Biol Rep* 36: 861-869.
23. Stoicanescu D, Andreescu N, Belengeanu A, Meszaros N, Cornianu M (2013) Assessment of p53 and HER-2/neu genes status and protein products in oral squamous cell carcinomas. *Rom J Morphol Embryol* 54: 1107-1113.
24. Wong YK, Liu TY, Chang KW, Lin SC, Chao TW, et al. (1998) p53 alterations in betel quid- and tobacco-associated oral squamous cell carcinomas from Taiwan. *J Oral Pathol Med* 27: 243-248.
